# Supplementary material for: Isolation of Circulating Tumour Cells in Patients With Glioblastoma Using Spiral Microfluidic Technology – A Pilot Study
Source: Frontiers journal article supplement (doi:10.3389/fonc.2021.681130), 2021-06-03
Supplement: Data_Sheet_1.pdf [file Data_Sheet_1.pdf]

## *Supplementary Material*

**Table S1. CTC counts of 20 GBM patients (before and after surgery)**

|    | CTC<br>(spiral/ml<br>of blood) | Marker      | Collection               | CTC<br>(spiral/ml<br>of blood) | Marker       | Collection            |
|----|--------------------------------|-------------|--------------------------|--------------------------------|--------------|-----------------------|
|    | Before surgery                 |             |                          | After surgery                  |              |                       |
| 1  | 1                              | GFAP*       | 2 days before<br>surgery | 2                              | GFAP         | 5 days after surgery  |
| 2  | 1                              | GFAP        | 3 days before<br>surgery | 3                              | GFAP         | 4 days after surgery  |
| 3  | 1                              | GFAP        | Same day                 | 0                              | -            | 3 days after surgery  |
| 4  | 0                              | -           | 1 day before surgery     | 0                              | -            | 3 days after surgery  |
| 5  | 17 <sup>#</sup>                | GFAP<br>CSV | Same day                 | 3 <sup>#</sup>                 | GFAP<br>CSV* | 9 days after surgery  |
| 6  | 5                              | GFAP*       | 1 day before surgery     | 5                              | GFAP         | 2 days after surgery  |
| 7  | 0                              | -           | Same day                 | 0                              | -            | 3 days after surgery  |
| 8  | 1                              | GFAP        | 1 day before surgery     | 0                              | -            | 3 days after surgery  |
| 9  | 0                              | -           | 3 days before<br>surgery | 2                              | GFAP         | 10 days after surgery |
| 10 | 3                              | GFAP        | 1 day before<br>surgery  | 2                              | GFAP         | 7 days after surgery  |
| 11 | 0                              | -           | Same day                 | 3                              | GFAP         | 5 days after surgery  |

|    |                 |             |                       |     |             |                      |
|----|-----------------|-------------|-----------------------|-----|-------------|----------------------|
| 12 | 0               | -           | Same day              | 1   | GFAP<br>CSV | 6 days after surgery |
| 13 | 0               | -           | 1 day before surgery  | 0   | -           | 5 days after surgery |
| 14 | 0               | -           | 1 day before surgery  | 1   | CSV         | 6 days after surgery |
| 15 | 24 <sup>#</sup> | GFAP        | Same day              | 3   | GFAP<br>CSV | 2 days after surgery |
| 16 | 0               | -           | 3 days before surgery | 0   | -           | 4 days after surgery |
| 17 | 0               | -           | Same day              | N/A | -           | -                    |
| 18 | 0               | -           | Same day              | 0   | -           | 3 days after surgery |
| 19 | 2               | GFAP<br>CSV | Same day              | 1   | GFAP        | 5 days after surgery |
| 20 | 0               | -           | Same day              | 0   | -           | 5 days after surgery |

\* = EGFR amplified; N/A = not available; <sup>#</sup> = cluster found

**Table S2.** Antibodies used and staining conditions

| Primary antibody                                                             | Dilution and incubation time | Secondary antibody                                                                              | Concentration and incubation time | Isotype Control (same concentration and incubation time) |
|------------------------------------------------------------------------------|------------------------------|-------------------------------------------------------------------------------------------------|-----------------------------------|----------------------------------------------------------|
| <b>Anti-Glial Fibrillary Acidic Protein (GFAP) unconjugated. Dako –Z0334</b> | 1:500<br>3 h - RT            | Goat Anti-Rabbit IgG (Alexa Fluor 647) Abcam – ab150079 or<br>Goat Anti-Rabbit IgG (Alexa Fluor | 1:1000<br>1 h -RT<br>Or           | Rabbit IgG Isotype Control<br><br>Abcam - ab172730       |

|                                                                 |                         |                              |                       |                                                                                                               |
|-----------------------------------------------------------------|-------------------------|------------------------------|-----------------------|---------------------------------------------------------------------------------------------------------------|
|                                                                 |                         | 555) Abcam – ab<br>ab150078) | 1:2000<br><br>1 h -RT |                                                                                                               |
| <b>Anti-CD45<br/>(Alexa Fluor<br/>488) Abcam –<br/>ab197730</b> | 1:200<br><br>1:30h - RT | -                            | -                     | Mouse IgG2a<br>Isotype control<br>(PPV-04),<br>Alexa Fluor 488<br>Thermo Fischer<br>Scientific –<br>MA5-18169 |
| <b>Anti-CD45 –<br/>(APC) BD<br/><br/>340943</b>                 | 1:50<br><br>1h - RT     | -                            |                       | Mouse IgG1, $\kappa$ ,<br>Isotype Control<br>(APC) BD<br>554681                                               |
| <b>Cell Surface<br/>Vimentin<br/>(FTIC) -<br/>Abnova DH0043</b> | 1:150<br><br>1h - RT    | -                            |                       | Mouse IgG2b, $\kappa$<br>Isotype control<br>(FITC)<br>Biolegend<br>400309                                     |

A)

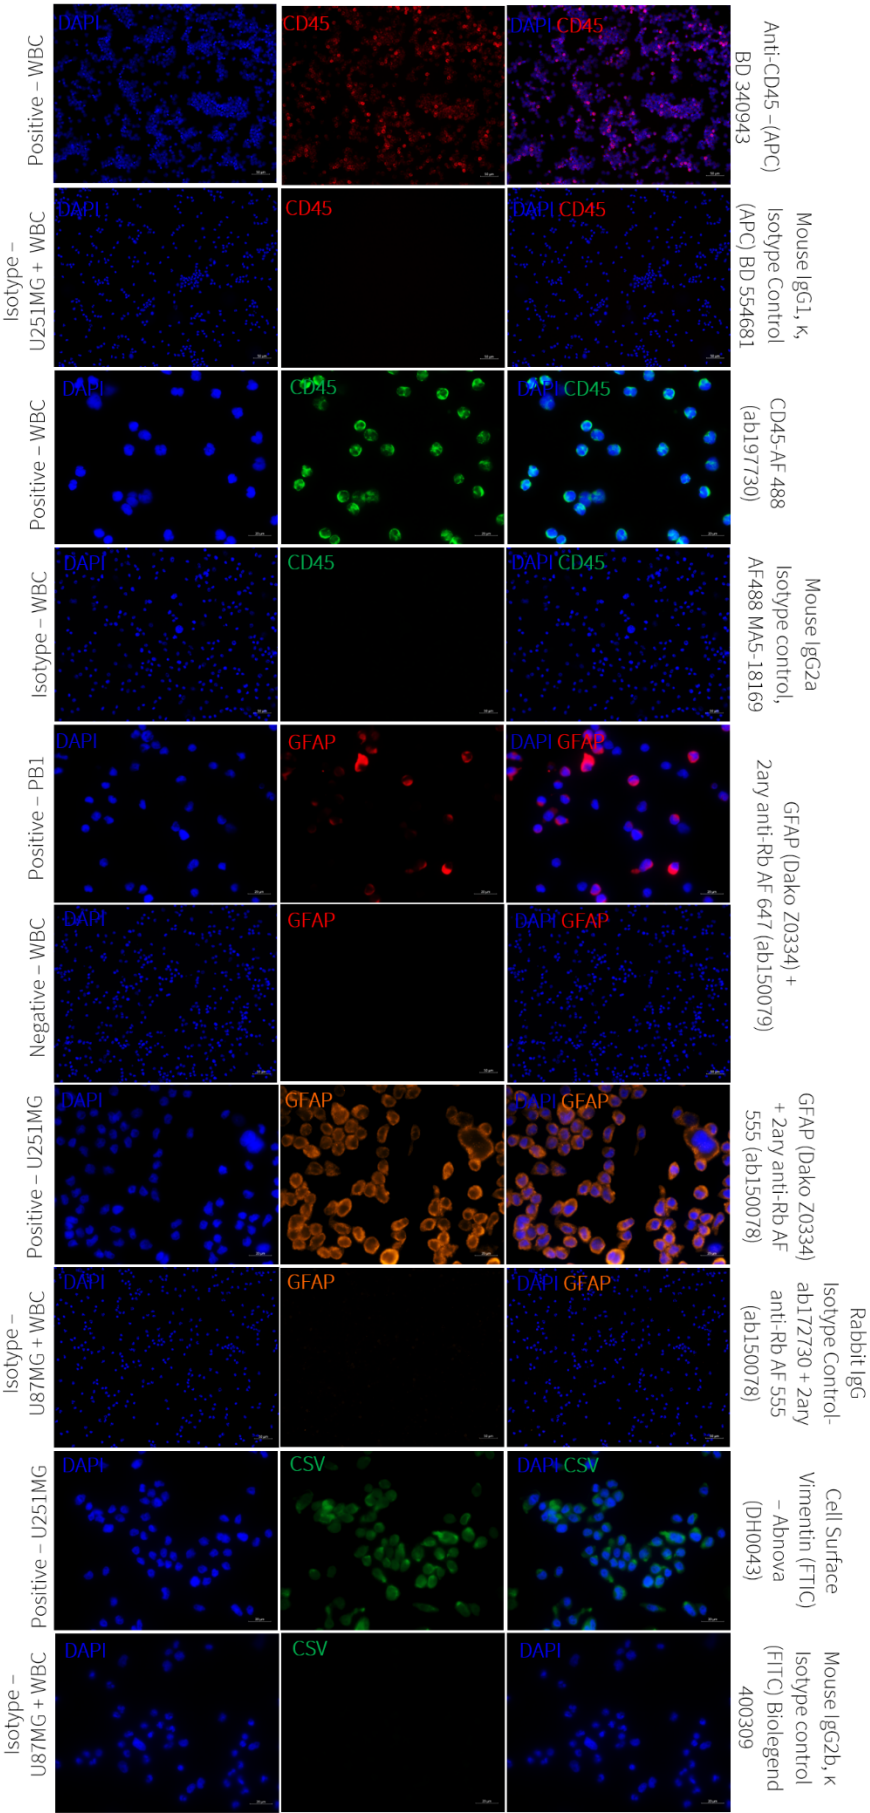

B)

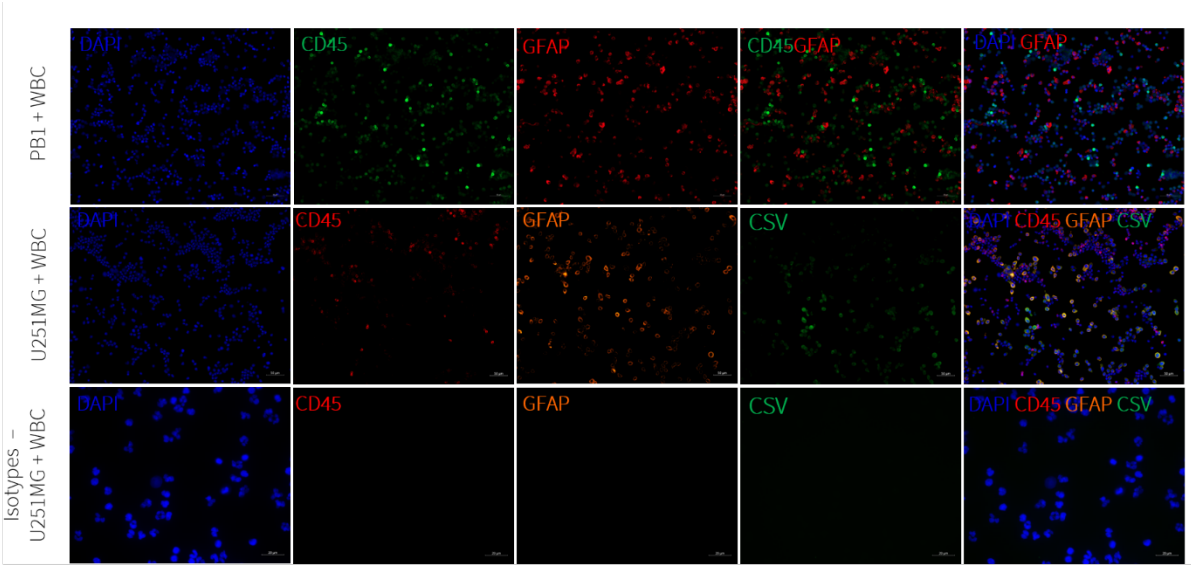

**Figure S1.** Validation panel of antibody. A panel of representative images consisting of negative and positive controls for all antibodies used in this study individually (A) and in combination (B).
